# Supplementary material
Source: Research Square preprint supplement (doi:10.21203/rs.3.rs-8957391/v1)
Supplement: Supplementary file 1 [file 4994c1de48059409f0d7dd73.docx]

Supplementary Material

Incidence of Hospital-Acquired Infections And Associated Factors Among Patients In North Shoa Zone Public Hospitals, Amhara Region, Ethiopia, 2025.

Annexes

**Annex** I. Informed written consent form.

Debre Berhan University Asrat Weldeyes Health Science campus schools of public health

Hello,

My name is _____________. I am a data collector for a study to assess the incidence and risk factors associated with hospital-acquired infections among admitted patients in public hospitals in North Shoa Zone, Amhara Region, Ethiopia, 2025. The purpose of this study is to assess the incidence and associated factors on patients admitted to the hospital and stay 48 hours from September 10, 2022, to September 10, 2024, in your hospital in all wards. To fulfill this purpose your institution has been randomly selected for this study. Your participation in responding to registration with genuine information is very important and highly appreciated. I would like to assure you that the patient's name will not be written on this form and all the information gathered will be kept strictly confidential. There are no risks associated with participating in this study. There is no direct compensation for participating in this study, however, the information that you will give from registration is very important to relevant stakeholders and responsible bodies. This will certainly support the needs of health institutions such as your hospital.

If you consent, please sign below for each ward focal person

Identification number of respondent’s Signature______ Date______

Name of data collector __Signature ______ Date______

Thank you for being voluntary to participate in the study.

Annex II

**Data Collection tool (Questionnaire)**

1. Patient ID/CODE ____________________________________________________
2. Ward_______________ Bed number _________________MRN__________________
3. Age ____________________
4. Sex ______________________
5. Marital Status A, Married B. Unmarried
6. Educational status , A, Illiterate B, literate
7. Occupation , A, Private B, Government
8. Residence A. Urban___________ B. Rural____________
9. Reason for admission/Dx at the time of admission_______________________________________________________________

________________________________________________________________________

_______________________________________________________________________

1. Complete admission diagnoses ______________________________________________
2. Date of admisstion________________________________________________________
3. Patient's health condition at the time of admission

________________________________________________________________________ ________________________________________________________________________

________________________________________________________________________

1. Is there any other localized infection? Yes No
2. If yes, type of treatment given____________________________________________
3. Previous hospitalization Yes No
4. If yes for question 14:
   - 1. Place (including ward) ______________________________________
     2. Time (month/year) _________________________________________
     3. Duration__________________________________________________
5. Previous antibiotic use for the current illness A. Yes__________ B. No_____________
6. If yes for question 15, specify________________________________________________
7. If yes for question 15, for how many days? ____________days
8. Being on mechanical ventilator? A. Yes_______ B. No___________
9. Presence of intravenous line? A. Yes_______ B. No___________
10. Presence of urinary catheters? A. Yes_______ B. No___________

If yes, for how long_________________

1. Indication for catheterization ________________________________
2. Drainage inserted. A. Yes_______ B. No___________
3. If yes, for how long _______________________________
4. Indication for drainage _________________________________________
5. Presence of invasive medical devices? A. Yes__________ B. No__________
6. If yes for question 20,21,22,26 (more than one answer is possible)
   1. Endotracheal tube? A. Yes__________ B. No_________
   2. NGT A. Yes__________ B. No_________
   3. Chest tube A. Yes__________ B. No_________
7. Peripheral intravenous line (IV) catheter A. Yes___________ B. No_________
8. Insertion of a urinary catheter A. Yes___________ B. No_________
9. Intubation A. Yes___________ B. No_________
10. Underlying diseases? A. Yes___________ B. No_________ 29. If yes, underlying diseases (more than one answer is possible)

I. Diabetes mellitus II. Chronic renal failure) III. Hypertension, VI. Cardiac disorders VII, severe malnutrition (SAM) VII. TB IV. Chronic liver disease IX. Cancer X. HIV/AIDS X. Others (specify)

1. Surgery since admission A. Yes___________ B. No___________
2. Surgical procedure done? A. Yes___________ B. No___________

If yes for question 36,

- 1. Type of surgery A. Elective________ B. Emergency___________
  2. Type of the procedure_______________________________________
  3. Date ________________ Time______________
  4. Duration of the surgery ________________hours
  5. Type of the surgical wound, A. Clean B. Clean contaminated C. Contaminated

D. Dirty

1. Antibiotic prophylaxis given? A. Yes_____________ B. No____________

If yes for Q36, specify/name of antibiotic_____________________________________

If yes for Q36, how many doses? ____________________________________________

1. Duration of hospital stay in days ________________________________________
2. Severe anemia [hemoglobin <50 g/L (for patients older than 28 days) or hemoglobin

<90 g/L (for neonates)]

A. Yes_____________ B. No____________ C. Unknown/not tested__________________

1. Immune deficiency A. Yes______ B. No_____ C. Unknown/not tested_________
2. Nutritional status WAZ score (Weight-for-age Z score ) A. >-3 B. -3 to 4 C.<-4
3. McCabe's score
   1. Non-fatal diseases
   2. Ultimately fatal diseases
   3. Rapidly fatal diseases
   4. Unknown
4. American Society of Anesthesiology (ASA) classification
   1. Normally health patient
   2. Patients with mild systemic diseases
   3. Patient with severe systemic disease that is not incapacitating
   4. Patients with incapacitating systemic diseases that are a constant threat to life
   5. Unknown
5. HIV status A. Reactive B. Non-reactive C. Unknown
6. Presence of HAIs based on CDC definition:

________________________________________________________________________ ________________________________________________________________________

1. Type of HAIs:

________________________________________________________________________

________________________________________________________________________

Name of data collectors: ______________ Signature __________________date

Name of supervisor___________________ Signature _________________ date

Annex III: Declaration

I, the undersigned, hereby declare that the work entitled “The revision of SRG AWHSC, 2025’’ presented in this research proposal is original. It has not been presented to any other university or institution. Where, the work of other people has been used, reference has been provided. In this regard, I declare this work to be our unique work.

Name and signature of the investigators

Name Signature Date

___________________ _____________ _________

Annex IV: Assurance of Principal Investigator

The undersigned agrees to accept responsibility for the scientific ethical and technical conduct of the research project and for the provision of required progress reports as per terms and conditions of the AWHSC in effect at the time of grant is forwarded as the result of this application.

Name of the principal investigator: ________________ Signature _____________Date. ________

**Approval of Advisors**

Name ____________________ Signature _____________Date. ____________________
